# Supplementary material for: Enhanced photocatalytic degradation of hazardous industrial pollutants with inorganic–organic TiO2–SnO2–GO hybrid nanocomposites
Source: Springer Nature journal article supplement (doi:10.1007/s10854-019-01706-1), 2019-07-01
Supplement: MOESM1 [file 16877020]

**SUPPORTING INFORMATION**

|  |  |
| --- | --- |
|  |  |

**Fig. S1**: (a, b, c, and d) are the absorbance spectra of TiO2, SnO2, GO and TS-rGO nanocomposites, respectively.


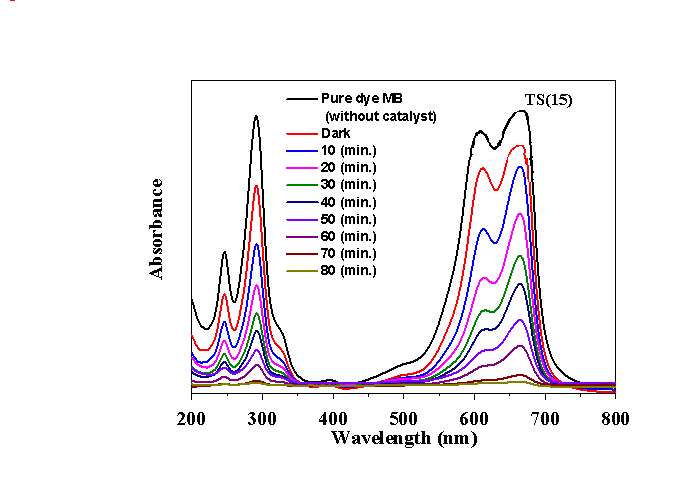


**Fig. S2:** Absorbance spectra of TS and TS-rGO nanocomposites under UV light with MB dye


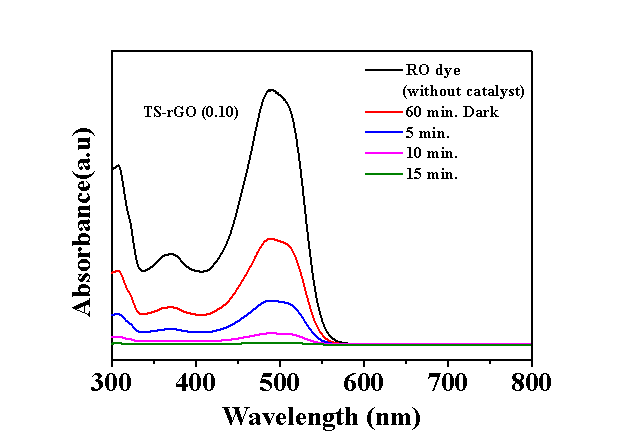


|  |  |
| --- | --- |

**Fig. S3:** Absorbance spectra of TS and TS-rGO nanocomposites under UV light with RO4 dye

**Fig. S4:** XRD spectra of TS-rGO nanocomposites after and before recyclability test with RO4 dye
